# Supplementary material for: NT-proBNP Levels Influence the Prognostic Value of Mineral Metabolism Biomarkers in Coronary Artery Disease
Source: MDPI journal article supplement (doi:10.3390/jcm11144153), 2022-07-17
Supplement: s1 [file s1]

## **Supplementary Material**

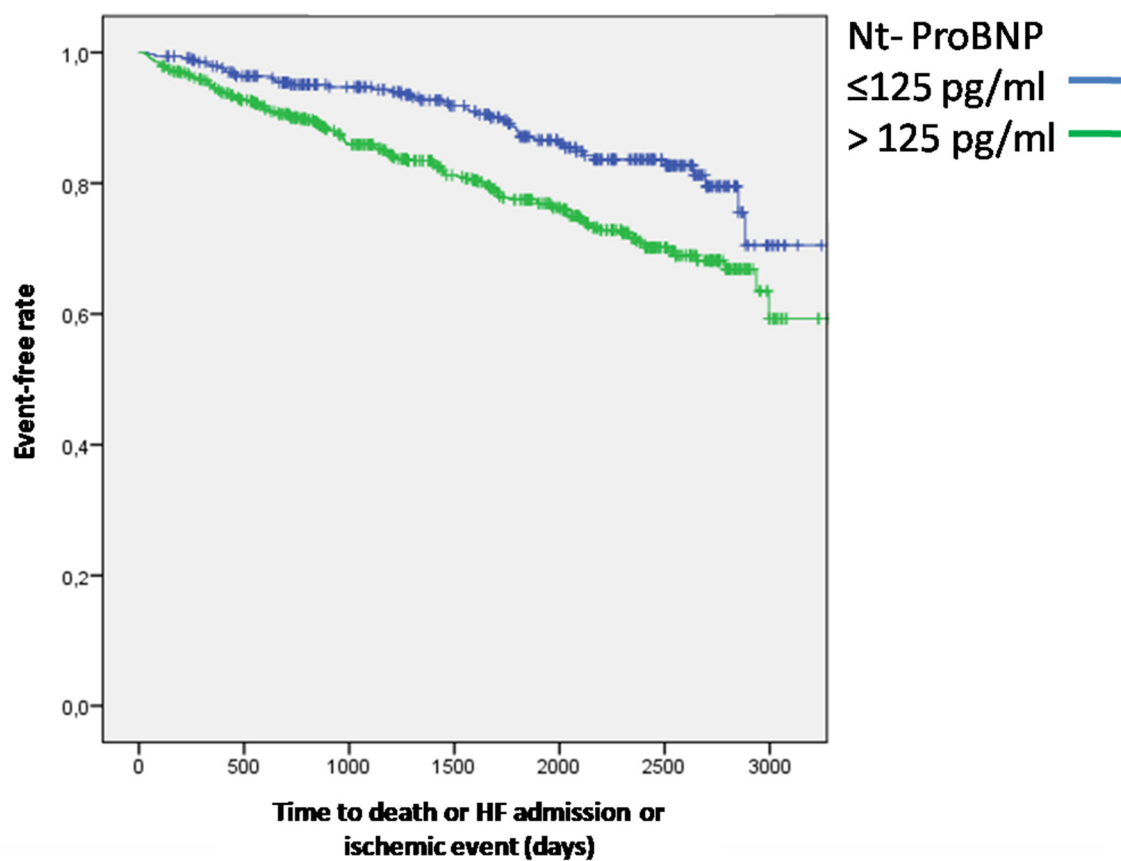

**Figure S1.** Kaplan-Meier curve showing time to first episode of death, HF admission or ischemic event according to NT-ProBNP levels.

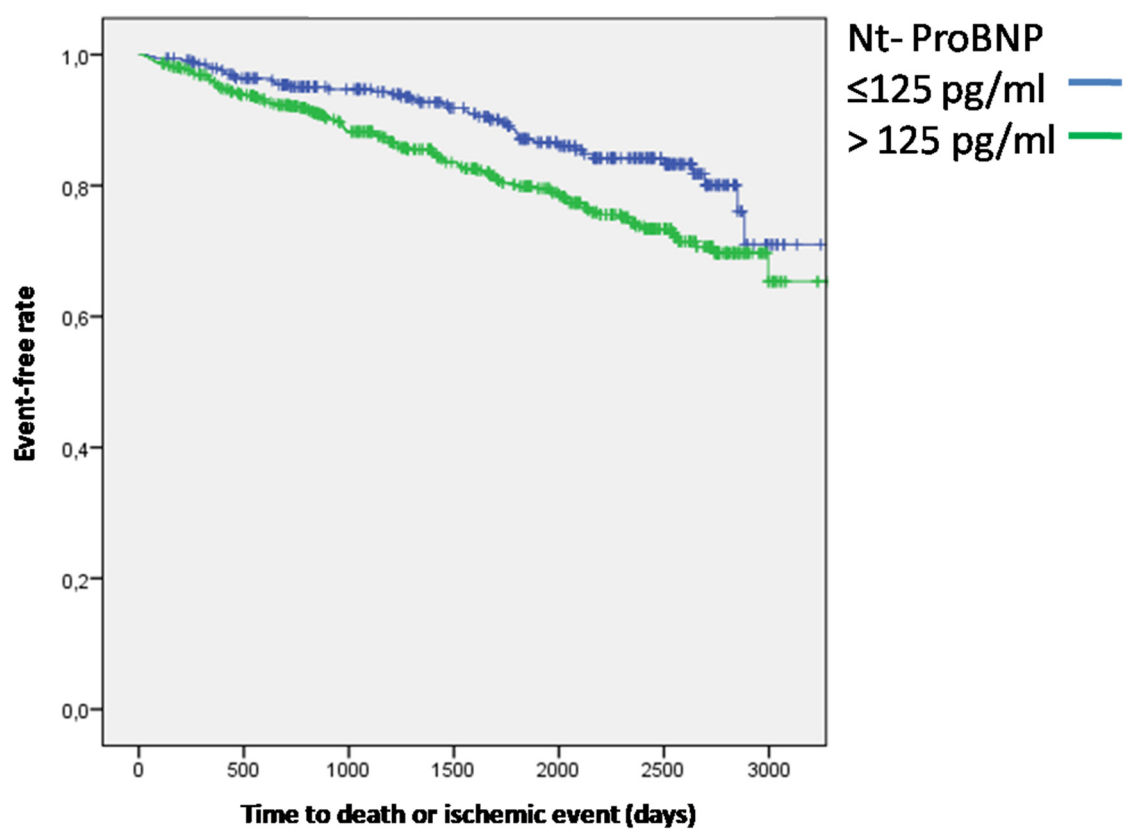

**Figure S2.** Kaplan-Meier curve showing time to first episode of death or ischemic event according to NT-ProBNP levels.

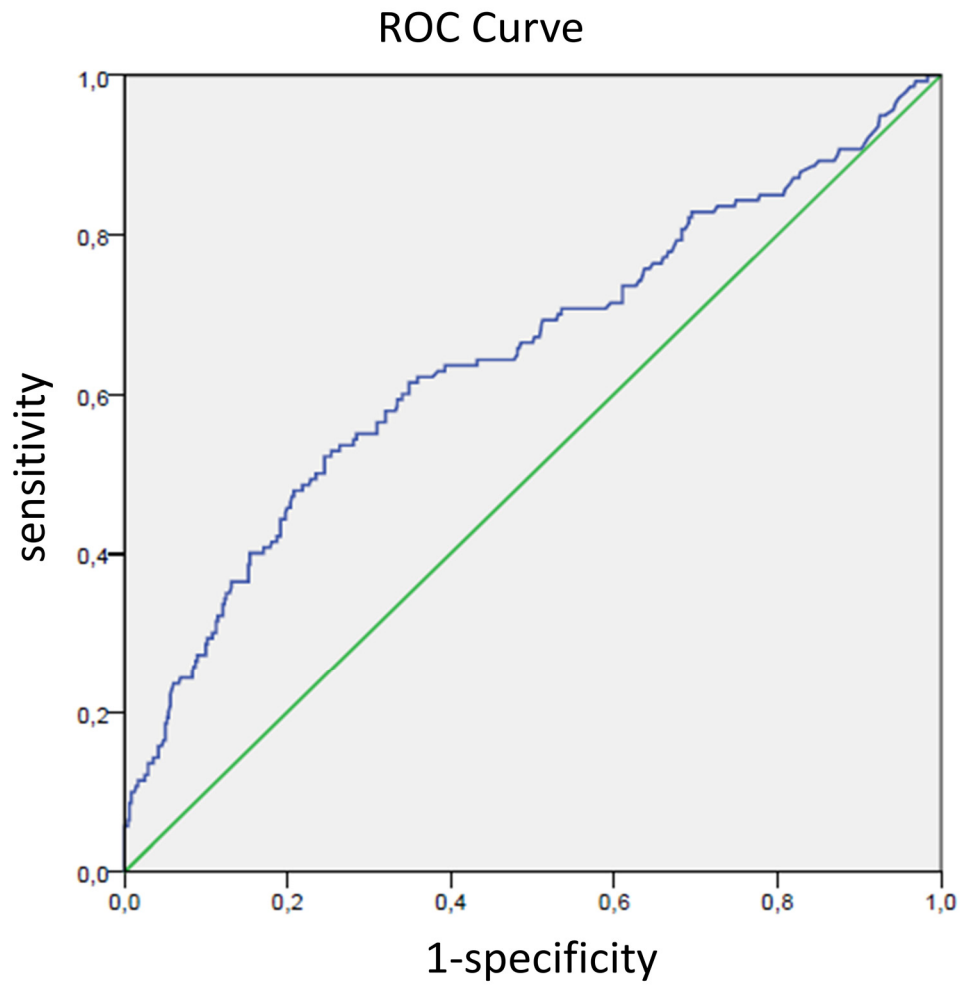

**Figure S3.** ROC Curve for NT-proBNP in the group of NT-proBNP > 125 pg/ml.

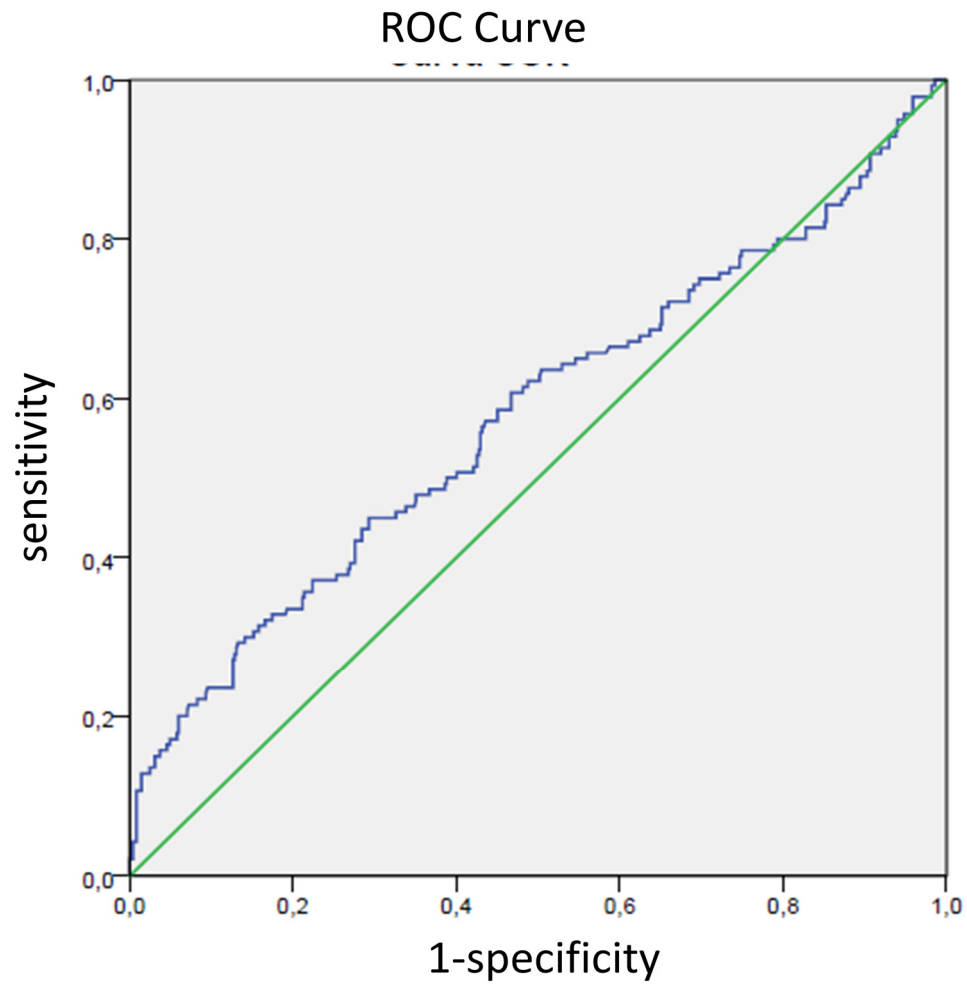

**Figure S4.** ROC Curve for PTH in the group of NT-proBNP > 125 pg/ml.

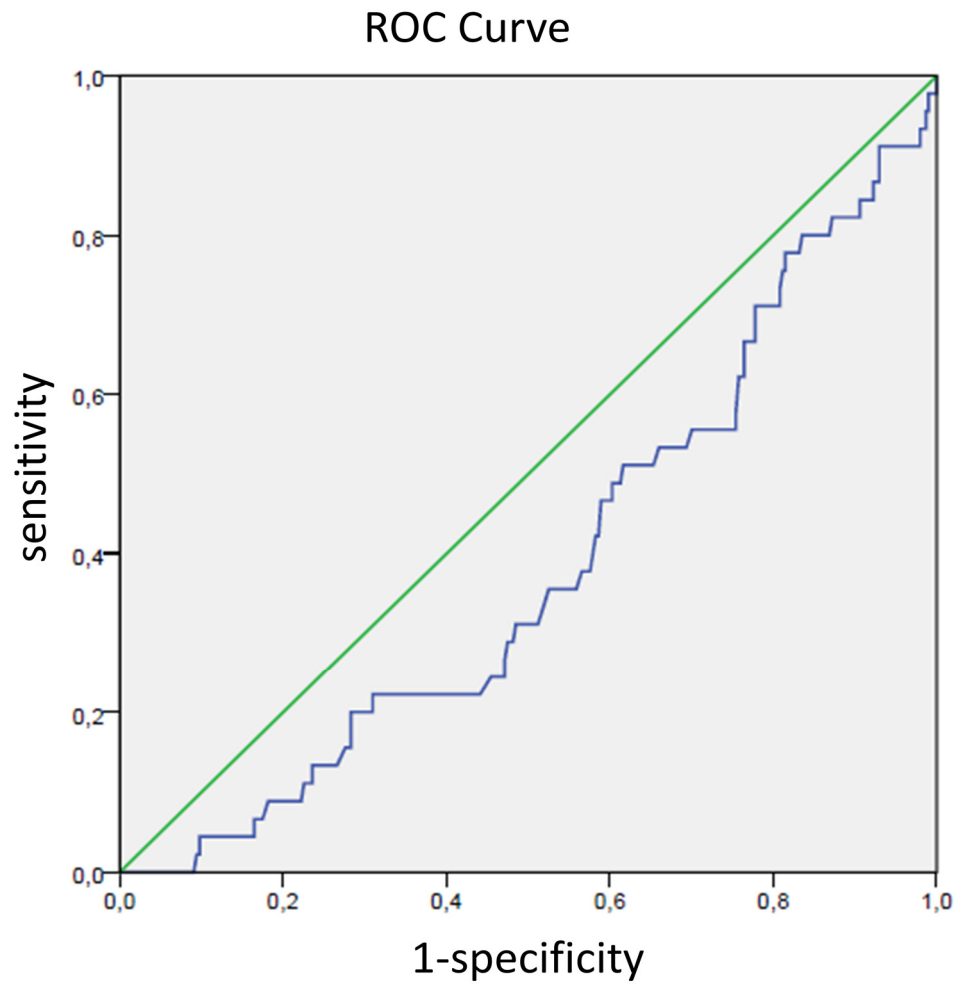

**Figure S5.** ROC Curve for calcdiol the group of NT-proBNP < 125 pg/ml.
